# Supplementary material for: Conformational changes in the P site and mRNA entry channel evoked by AUG recognition in yeast translation preinitiation complexes
Source: Oxford University Press journal article supplement (doi:10.1093/nar/gkv028), 2015-02-10
Supplement: gkv028_Supplementary_Data.zip [file gkv028_Supplementary_Data.zip]

Archive with 1 entries (1 files):
- nar-02810-r-2014-File012.pdf
